# Supplementary material for: Development of a high-resolution integrated emission inventory of air pollutants for China
Source: Copernicus journal article supplement (doi:10.5194/essd-16-2893-2024), 2024-06-21
Supplement: Supplementary file 1 [file essd-16-2893-2024-supplement.pdf]

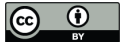

*Supplement of*

## **Development of a high-resolution integrated emission inventory of air pollutants for China**

**Nana Wu et al.**

*Correspondence to:* Guannan Geng ([guannangeng@tsinghua.edu.cn](mailto:guannangeng@tsinghua.edu.cn))

The copyright of individual parts of the supplement might differ from the article licence.

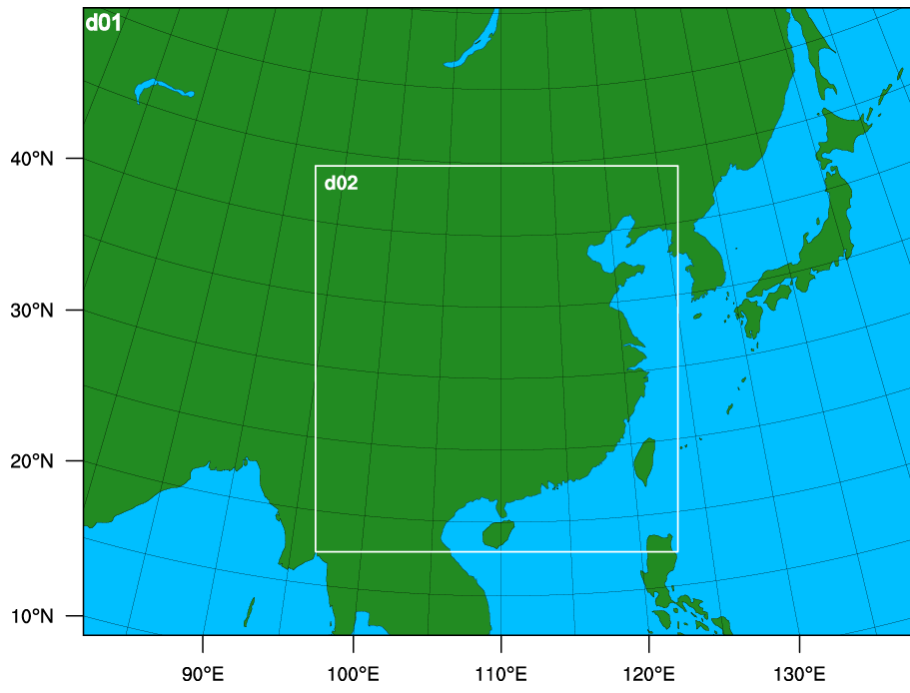

22 **Figure S1: Two nested domains in this study.** The first domain (D01) covers the entire Chinese mainland and parts of neighboring  
23 countries, and the second domain (D02) covers the Eastern China.

| 1 <sup>st</sup> level source | 2 <sup>nd</sup> level source                                                                        |
|------------------------------|-----------------------------------------------------------------------------------------------------|
| <b>Stationary Combustion</b> | Mining and Washing of Coal                                                                          |
|                              | Extraction of Petroleum and Natural Gas                                                             |
|                              | Mining and Processing of Ferrous Metal Ores                                                         |
|                              | Mining and Processing of Non-Ferrous Metal Ores                                                     |
|                              | Mining and Processing of Nonmetal Ores                                                              |
|                              | Support Activities for Mining                                                                       |
|                              | Mining of Other Ores                                                                                |
|                              | Processing of Food from Agricultural Products                                                       |
|                              | Manufacture of Foods                                                                                |
|                              | Manufacture of Liquor, Beverages and Refined Tea                                                    |
|                              | Manufacture of Tobacco                                                                              |
|                              | Manufacture of Textile                                                                              |
|                              | Manufacture of Textile, Wearing Apparel and Accessories                                             |
|                              | Manufacture of Leather, Fur, Feather and Related Products and Footwear                              |
|                              | Processing of Timber, Manufacture of Wood, Bamboo, Rattan, Palm, and Straw Products                 |
|                              | Manufacture of Furniture                                                                            |
|                              | Manufacture of Paper and Paper Products                                                             |
|                              | Printing and Reproduction of Recording Media                                                        |
|                              | Manufacture of Articles for Culture, Education, Arts and Crafts, Sport and Entertainment Activities |
|                              | Petroleum Processing, Coking and Nuclear Fuel Processing                                            |
|                              | Manufacture of Raw Chemical Materials and Chemical Products                                         |
|                              | Manufacture of Medicines                                                                            |
|                              | Manufacture of Chemical Fibers                                                                      |
|                              | Manufacture of Rubber and Plastics Products                                                         |
|                              | Manufacture of Non-metallic Mineral Products                                                        |
|                              | Smelting and Pressing of Ferrous Metals                                                             |
|                              | Smelting and Pressing of Non-ferrous Metals                                                         |
|                              | Manufacture of Metal Products                                                                       |
|                              | Manufacture of General Purpose Machinery                                                            |
|                              | Manufacture of Special Purpose Machinery                                                            |
|                              | Manufacture of Automobiles                                                                          |
|                              | Manufacture of Railway, Ship, Aerospace and Other Transport Equipment                               |
|                              | Manufacture of Electrical Machinery and Apparatus                                                   |
|                              | Manufacture of Computers, Communication and Other Electronic Equipment                              |
|                              | Manufacture of Measuring Instruments and Machinery                                                  |
|                              | Other Manufacture                                                                                   |
|                              | Utilization of Waste Resources                                                                      |
|                              | Repair Service of Metal Products, Machinery and Equipment                                           |
|                              | Production of Electric Power                                                                        |
|                              | Supply of Electric Power                                                                            |
|                              | Production of Industrial Heat Power                                                                 |
|                              | Production of Residential Heat Power                                                                |
| Production and Supply of Gas |                                                                                                     |
| Urban Residential            |                                                                                                     |
| Rural Residential            |                                                                                                     |
| <b>Industrial Process</b>    | Processing of Food from Agricultural Products                                                       |
|                              | Manufacture of Foods                                                                                |

|                                   |                                                             |
|-----------------------------------|-------------------------------------------------------------|
|                                   | Manufacture of Liquor, Beverages and Refined Tea            |
|                                   | Manufacture of Textile                                      |
|                                   | Manufacture of Paper and Paper Products                     |
|                                   | Petroleum Processing, Coking and Nuclear Fuel Processing    |
|                                   | Manufacture of Raw Chemical Materials and Chemical Products |
|                                   | Manufacture of Chemical Fibers                              |
|                                   | Manufacture of Rubber and Plastics Products                 |
|                                   | Manufacture of Non-metallic Mineral Products                |
|                                   | Smelting and Pressing of Ferrous Metals                     |
|                                   | Smelting and Pressing of Non-ferrous Metals                 |
| <b>Mobile Source</b>              | Passenger Vehicle                                           |
|                                   | Freight Truck                                               |
|                                   | Motorcycle                                                  |
|                                   | Construction Machinery                                      |
|                                   | Agricultural Machinery                                      |
|                                   | Small Equipment and Tools                                   |
|                                   | Diesel Generator Sets                                       |
|                                   | Ship                                                        |
|                                   | Locomotive                                                  |
|                                   | Domestic Aviation                                           |
| <b>Solvent Use</b>                | Printing ink                                                |
|                                   | Coating                                                     |
|                                   | Pesticide Use                                               |
|                                   | Other Solvent Use                                           |
| <b>Agriculture</b>                | Fertilizer                                                  |
|                                   | Livestock                                                   |
|                                   | Agricultural Soil                                           |
|                                   | Nitrogen-fixing Crop                                        |
|                                   | Composting of Crop Residue                                  |
|                                   | Human Feces                                                 |
| <b>Dust</b>                       | Soil Dust                                                   |
|                                   | Road Dust                                                   |
|                                   | Construction Dust                                           |
|                                   | Dust from Stockpiles                                        |
| <b>Biomass Burning</b>            | Biomass Fuel                                                |
|                                   | Open Biomass Burning                                        |
| <b>Storage and Transportation</b> | Storage and Transportation of Oil and Natural Gas           |
| <b>Waste Treatment</b>            | Disposal of Wastewater                                      |
|                                   | Disposal of Solid Waste                                     |
|                                   | Flue Gas Denitrification                                    |
| <b>Other Sources</b>              | Catering                                                    |

Table S2: Evaluation of simulated temperature, relative humidity, wind speed, and wind direction for D01 in 2017.

| Variable                    | Month | Sample | Mean_obs | Mean_sim | Corr | MB   | RMSE | NMB(%) | NME(%) |
|-----------------------------|-------|--------|----------|----------|------|------|------|--------|--------|
| Temperature<br>(°C)         | 1     | 425737 | 277.1    | 276.5    | 0.98 | -0.6 | 2.3  | 3.2    | -0.2   |
|                             | 2     | 398617 | 279      | 278.2    | 0.97 | -0.8 | 2.3  | 3.2    | -0.3   |
|                             | 3     | 444709 | 282.9    | 281.9    | 0.96 | -0.9 | 2.3  | 3.3    | -0.3   |
|                             | 4     | 430935 | 289.1    | 288.1    | 0.95 | -1   | 2.2  | 3.1    | -0.3   |
|                             | 5     | 443495 | 293.4    | 292.6    | 0.93 | -0.8 | 2.1  | 3      | -0.3   |
|                             | 6     | 423895 | 295.6    | 295      | 0.92 | -0.6 | 1.9  | 2.8    | -0.2   |
|                             | 7     | 432868 | 298.8    | 298.1    | 0.89 | -0.7 | 1.9  | 2.6    | -0.2   |
|                             | 8     | 437872 | 298      | 297.4    | 0.92 | -0.6 | 1.7  | 2.5    | -0.2   |
|                             | 9     | 430728 | 294.8    | 294.2    | 0.94 | -0.6 | 1.8  | 2.5    | -0.2   |
|                             | 10    | 448579 | 289.5    | 289.1    | 0.97 | -0.4 | 1.8  | 2.5    | -0.1   |
|                             | 11    | 431392 | 283.4    | 283      | 0.98 | -0.4 | 1.9  | 2.7    | -0.1   |
|                             | 12    | 445121 | 278      | 277.5    | 0.98 | -0.5 | 2.1  | 2.9    | -0.2   |
| Relative<br>Humidity<br>(%) | 1     | 425354 | 68       | 72.1     | 0.77 | 4.1  | 10   | 13.2   | 6      |
|                             | 2     | 398268 | 64.1     | 69.3     | 0.78 | 5.1  | 10.6 | 13.9   | 8      |
|                             | 3     | 444073 | 64.4     | 70       | 0.8  | 5.6  | 10.8 | 14.3   | 8.6    |
|                             | 4     | 429336 | 63.4     | 68.7     | 0.84 | 5.3  | 10.3 | 13.9   | 8.4    |
|                             | 5     | 443006 | 65       | 68.8     | 0.86 | 3.8  | 9.5  | 12.7   | 5.9    |
|                             | 6     | 423251 | 71       | 73.4     | 0.85 | 2.4  | 8.7  | 11.6   | 3.4    |
|                             | 7     | 432151 | 75.9     | 78.4     | 0.84 | 2.5  | 8.1  | 10.7   | 3.3    |
|                             | 8     | 437176 | 76.7     | 79       | 0.82 | 2.3  | 7.9  | 10.4   | 3      |
|                             | 9     | 429720 | 73.9     | 76       | 0.85 | 2.1  | 8.1  | 10.8   | 2.9    |
|                             | 10    | 447503 | 73.5     | 75.4     | 0.85 | 1.9  | 8.0  | 10.7   | 2.5    |
|                             | 11    | 430711 | 68.9     | 72       | 0.82 | 3.1  | 8.9  | 11.9   | 4.5    |
|                             | 12    | 444518 | 66.5     | 70.7     | 0.81 | 4.2  | 9.5  | 12.5   | 6.3    |
| Wind Speed<br>(m/s)         | 1     | 404082 | 2.8      | 3.2      | 0.6  | 0.4  | 1.6  | 2.2    | 14.9   |
|                             | 2     | 381158 | 2.9      | 3.3      | 0.62 | 0.3  | 1.6  | 2.1    | 11.7   |
|                             | 3     | 428428 | 2.7      | 2.9      | 0.59 | 0.2  | 1.4  | 1.9    | 6      |
|                             | 4     | 418972 | 3        | 3.1      | 0.63 | 0.1  | 1.5  | 1.9    | 2.3    |
|                             | 5     | 431251 | 2.7      | 2.7      | 0.62 | 0    | 1.3  | 1.8    | -1     |
|                             | 6     | 410320 | 2.6      | 2.6      | 0.56 | 0    | 1.3  | 1.7    | -1     |
|                             | 7     | 417858 | 2.4      | 2.4      | 0.53 | 0    | 1.3  | 1.7    | -1.9   |
|                             | 8     | 424714 | 2.5      | 2.5      | 0.58 | 0    | 1.3  | 1.7    | -1     |
|                             | 9     | 417017 | 2.5      | 2.5      | 0.63 | 0.1  | 1.3  | 1.7    | 2.8    |
|                             | 10    | 429166 | 2.7      | 2.8      | 0.67 | 0.2  | 1.4  | 1.9    | 5.8    |
|                             | 11    | 416456 | 2.7      | 2.9      | 0.64 | 0.2  | 1.4  | 1.9    | 7.7    |
|                             | 12    | 428713 | 2.8      | 3.1      | 0.66 | 0.3  | 1.5  | 2      | 10.5   |

| Variable           | Month | Sample | Mean_obs | Mean_sim | Corr | MB    | RMSE | NMB(%) | NME(%) |
|--------------------|-------|--------|----------|----------|------|-------|------|--------|--------|
| Wind Direction (°) | 1     | 344078 | 207.3    | 202.5    | 0.4  | -4.8  | 79.4 | 125.8  | -2.3   |
|                    | 2     | 325981 | 210.2    | 209.2    | 0.43 | -0.9  | 72.9 | 117.1  | -0.4   |
|                    | 3     | 368216 | 202.3    | 196.1    | 0.41 | -6.3  | 76.9 | 121.3  | -3.1   |
|                    | 4     | 363361 | 198.5    | 194.1    | 0.42 | -4.4  | 66.3 | 106.5  | -2.2   |
|                    | 5     | 368370 | 192.7    | 185.7    | 0.38 | -7    | 70.6 | 109.8  | -3.6   |
|                    | 6     | 351094 | 189.9    | 180.7    | 0.35 | -9.2  | 71.6 | 111.2  | -4.8   |
|                    | 7     | 356046 | 192.7    | 184.5    | 0.34 | -8.1  | 67.1 | 103.5  | -4.2   |
|                    | 8     | 362346 | 188      | 171.4    | 0.38 | -16.6 | 71   | 111.6  | -8.8   |
|                    | 9     | 349721 | 194.6    | 180.1    | 0.38 | -14.5 | 73.9 | 115.5  | -7.5   |
|                    | 10    | 357403 | 183.5    | 159.8    | 0.4  | -23.6 | 81.6 | 129.8  | -12.9  |
|                    | 11    | 351239 | 203.7    | 192.2    | 0.42 | -11.5 | 76.7 | 122.4  | -5.7   |
|                    | 12    | 365757 | 211.2    | 200.4    | 0.42 | -10.8 | 76.9 | 123.1  | -5.1   |

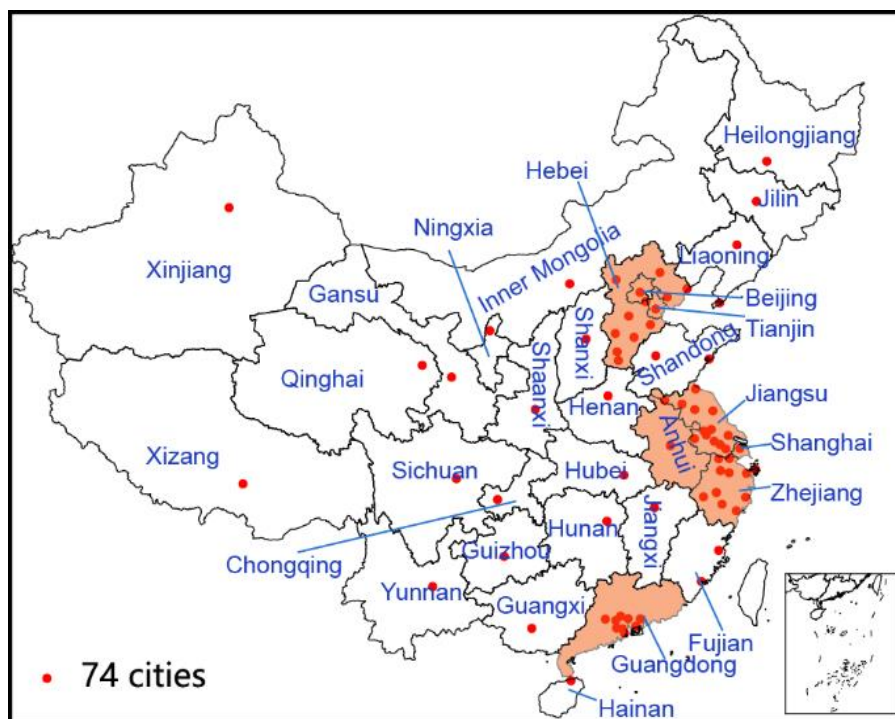

28 **Figure S2: The location of key regions, provinces, and 74 cities in China.** The shaded areas in orange from north to south represent the  
 29 BTH, YRD, and PRD regions. Hong Kong, Macao, and Taiwan are excluded provinces due to unavailability of emission data. The red  
 30 dots denote the locations of the 74 major cities.

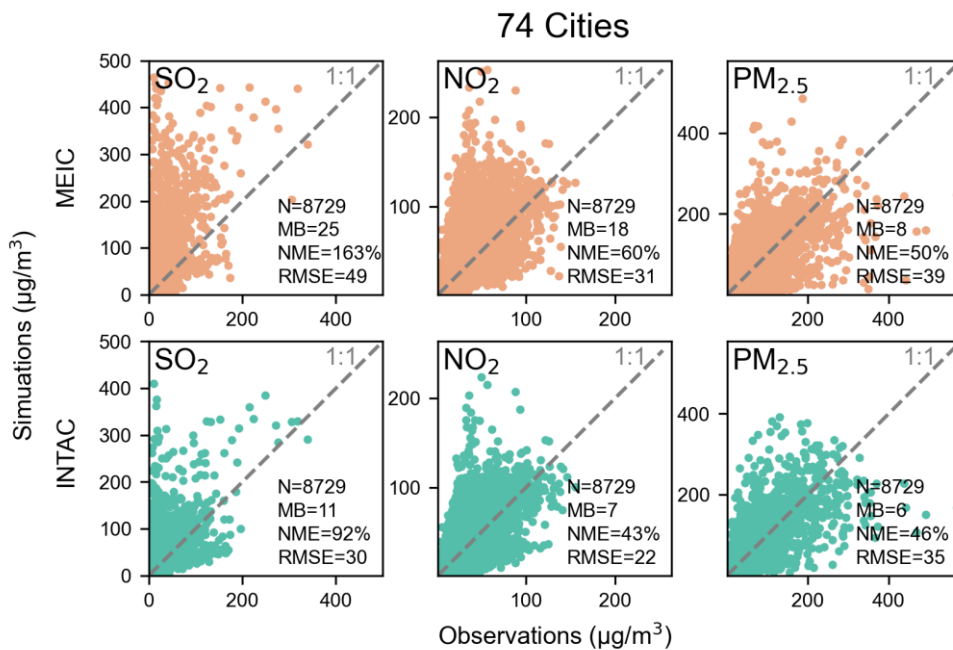

31 **Figure S3: Scatter plots comparing modeling performance over 74 cities using MEIC and INTAC as emission inputs, respectively.**  
 32 Each point represents the city-average daily concentrations for key air pollutants. The statistical metrics, including R, MB (µg/m<sup>3</sup>), and  
 33 RMSE (µg/m<sup>3</sup>), are labeled in the figure.

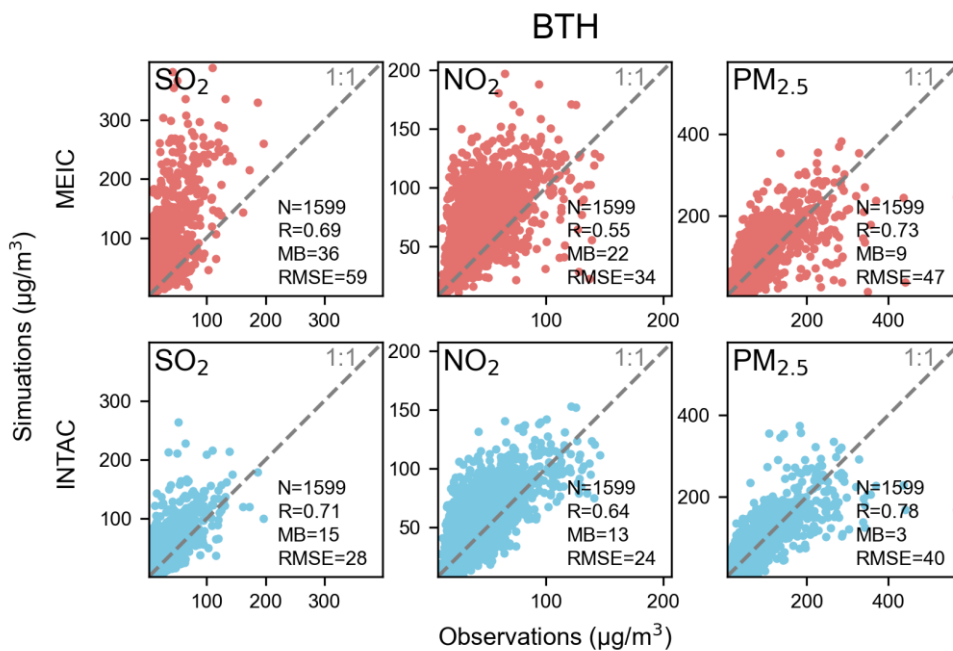

34 **Figure S4: Scatter plots comparing modeling performance across the BTH using MEIC and INTAC as emission inputs,**  
 35 **respectively.** Each point represents the city-average daily concentrations for key air pollutants. The statistical metrics, including R, MB  
 36 (µg/m<sup>3</sup>), and RMSE (µg/m<sup>3</sup>), are labeled in the figure.

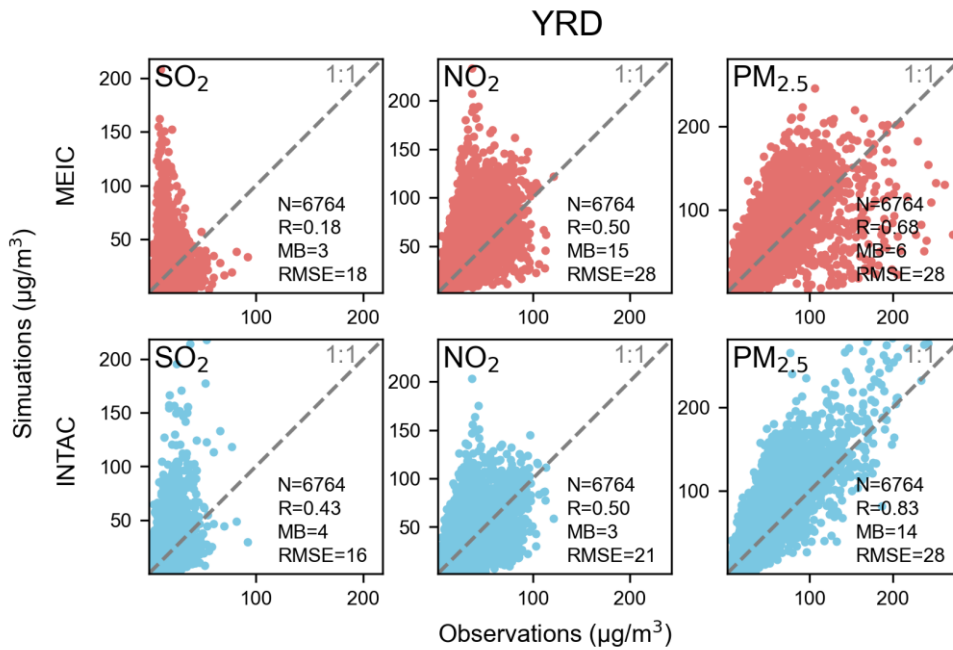

37 **Figure S5: Scatter plots comparing modeling performance across the YRD using MEIC and INTAC as emission inputs,**  
 38 **respectively.** Each point represents the city-average daily concentrations for key air pollutants. The statistical metrics, including R, MB  
 39 ( $\mu\text{g}/\text{m}^3$ ), and RMSE ( $\mu\text{g}/\text{m}^3$ ), are labeled in the figure.

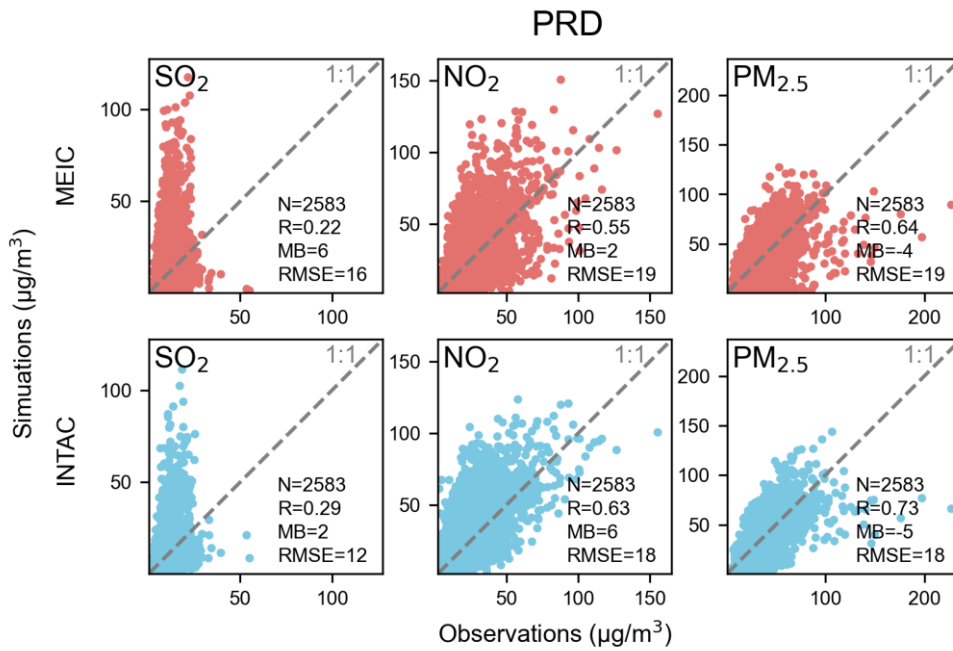

40 **Figure S6: Scatter plots comparing modeling performance across the PRD using MEIC and INTAC as emission inputs,**  
 41 **respectively.** Each point represents the city-average daily concentrations for key air pollutants. The statistical metrics, including R, MB  
 42 ( $\mu\text{g}/\text{m}^3$ ), and RMSE ( $\mu\text{g}/\text{m}^3$ ), are labeled in the figure.



**Table S3: The discrepancies between simulated NH<sub>4</sub><sup>+</sup> concentrations and observed values, using MEIC and INTAC as emission inputs. The observed concentrations are collected from previous studies (Zhang et al., 2019).**

| Month       | MEIC                                |                                     |                                    |            |            | INTAC                               |                                     |                                    |            |            |
|-------------|-------------------------------------|-------------------------------------|------------------------------------|------------|------------|-------------------------------------|-------------------------------------|------------------------------------|------------|------------|
|             | Obs<br>( $\mu\text{g}/\text{m}^3$ ) | Sim<br>( $\mu\text{g}/\text{m}^3$ ) | MB<br>( $\mu\text{g}/\text{m}^3$ ) | NMB<br>(%) | NME<br>(%) | Obs<br>( $\mu\text{g}/\text{m}^3$ ) | Sim<br>( $\mu\text{g}/\text{m}^3$ ) | MB<br>( $\mu\text{g}/\text{m}^3$ ) | NMB<br>(%) | NME<br>(%) |
| <b>Jan.</b> | 12.9                                | 5.9                                 | -7.0                               | -53        | 53         | 12.9                                | 6.4                                 | -6.5                               | -50        | 50         |
| <b>Apr.</b> | 5.5                                 | 4.7                                 | -0.8                               | -16        | 25         | 5.5                                 | 3.8                                 | -1.7                               | -32        | 32         |
| <b>Jul.</b> | 3.4                                 | 2.5                                 | -0.9                               | -26        | 26         | 3.4                                 | 2.9                                 | 0.5                                | -15        | 15         |
| <b>Oct.</b> | 5.9                                 | 5.2                                 | -0.7                               | -12        | 33         | 5.9                                 | 5.9                                 | 0.0                                | 1          | 38         |

45 **References**

46 Zhang, Q., Zheng, Y., Tong, D., Shao, M., Wang, S., Zhang, Y., Xu, X., Wang, J., He, H., Liu, W., Ding, Y., Lei, Y., Li, J., Wang, Z.,  
47 Zhang, X., Wang, Y., Cheng, J., Liu, Y., Shi, Q., Yan, L., Geng, G., Hong, C., Li, M., Liu, F., Zheng, B., Cao, J., Ding, A., Gao, J., Fu, Q.,  
48 Huo, J., Liu, B., Liu, Z., Yang, F., He, K., and Hao, J.: Drivers of improved PM2.5 air quality in China from 2013 to 2017, Proc Natl Acad  
49 Sci U S A, 116, 24463-24469, 10.1073/pnas.1907956116, 2019.
